# Supplementary material
Source: PubMed Central journal article supplement (PMC6601351)
Supplement: NIHMS1032470-supplement-1.pdf [file NIHMS1032470-supplement-1.pdf]

1 **Supplemental Information for**

2 **KNL1 binding to PP1 and microtubules is mutually exclusive**

3

4 **Rakhi Bajaj<sup>1</sup>, Mathieu Bollen<sup>2</sup>, Wolfgang Peti<sup>1</sup>, Rebecca Page<sup>1\*</sup>**

5 <sup>1</sup>Department of Chemistry and Biochemistry, University of Arizona, AZ 85721, USA; <sup>2</sup>Laboratory

6 of Biosignaling & Therapeutics, Department of Cellular and Molecular Medicine, KU Leuven,

7 Belgium.

8

9

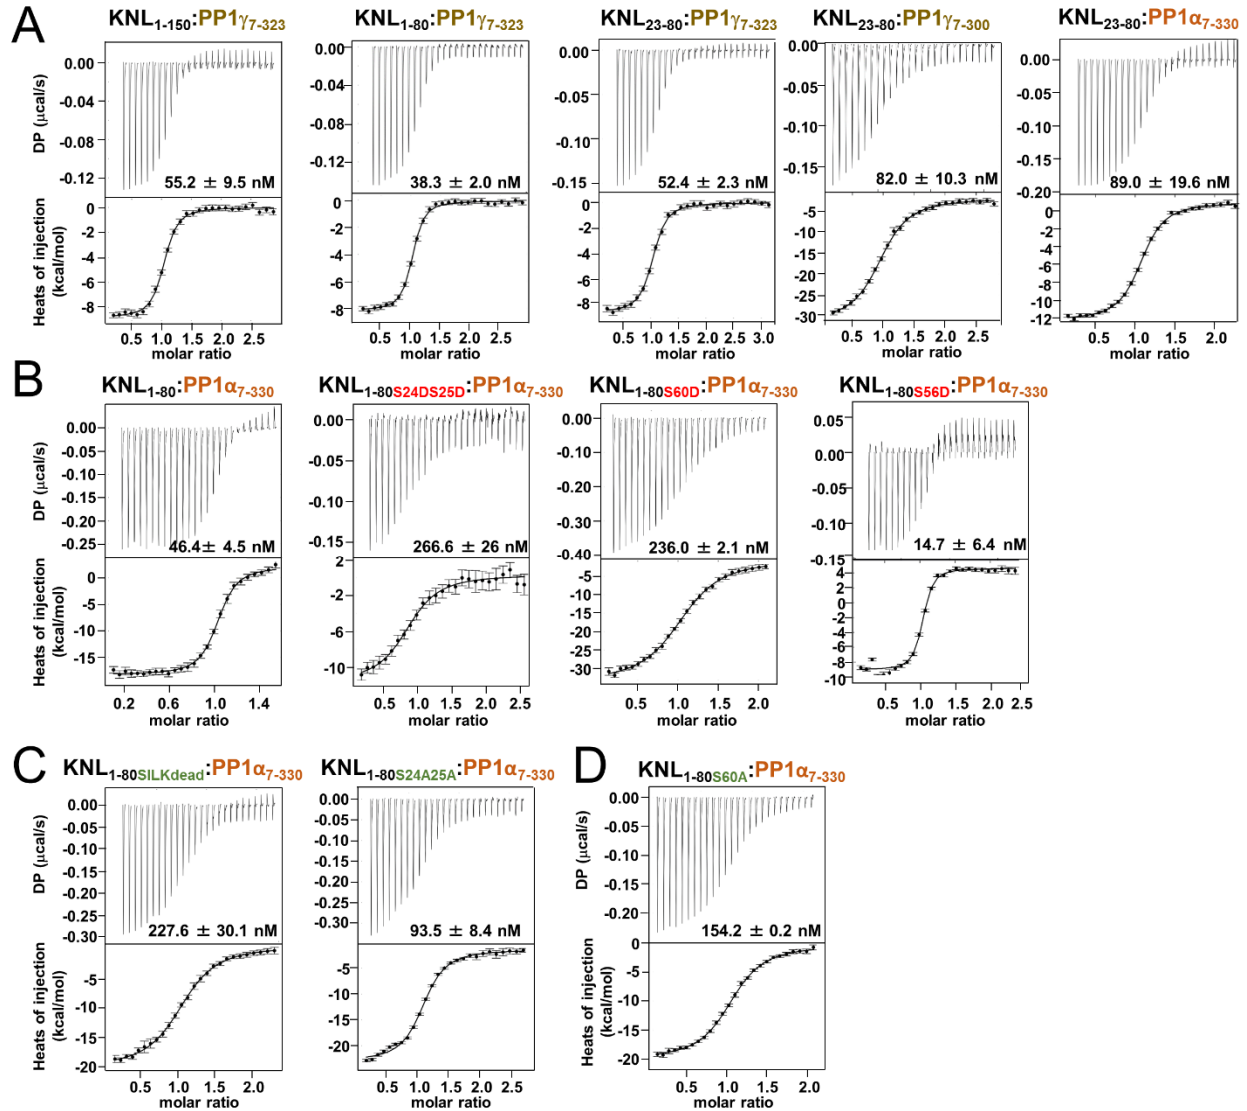

10

11

12 **Figure S1. Isothermal titration calorimetry of KNL1 with PP1.**

13 Related to Figure 1.

14 (A) KNL1<sub>1-150</sub>:PP1<sub>γ7-323</sub>, KNL1<sub>1-80</sub>:PP1<sub>γ7-323</sub>, KNL1<sub>23-80</sub>:PP1<sub>γ7-323</sub>, KNL1<sub>23-80</sub>:PP1<sub>γ7-300</sub>, KNL1<sub>23-</sub>  
 15 <sub>80</sub>:PP1<sub>α7-330</sub>.

16 (B) WT and phosphomimetic mutants of KNL1 with PP1: KNL1<sub>1-80</sub>:PP1<sub>α7-330</sub>, KNL1<sub>1-</sub>  
 17 <sub>80S24DS25D</sub>:PP1<sub>α7-330</sub>, KNL1<sub>1-80S60D</sub>:PP1<sub>α7-330</sub>, KNL1<sub>1-80S56D</sub>:PP1<sub>α7-330</sub>.

18 (C) SILK mutants of KNL1 with PP1: KNL1<sub>1-80SILKdead</sub>:PP1<sub>α7-330</sub>, KNL1<sub>1-80S24A25A</sub>:PP1<sub>α7-330</sub>.

19 (D) RVxF mutant of KNL1 with PP1: KNL1<sub>1-80S60A</sub>:PP1<sub>α7-330</sub>

20

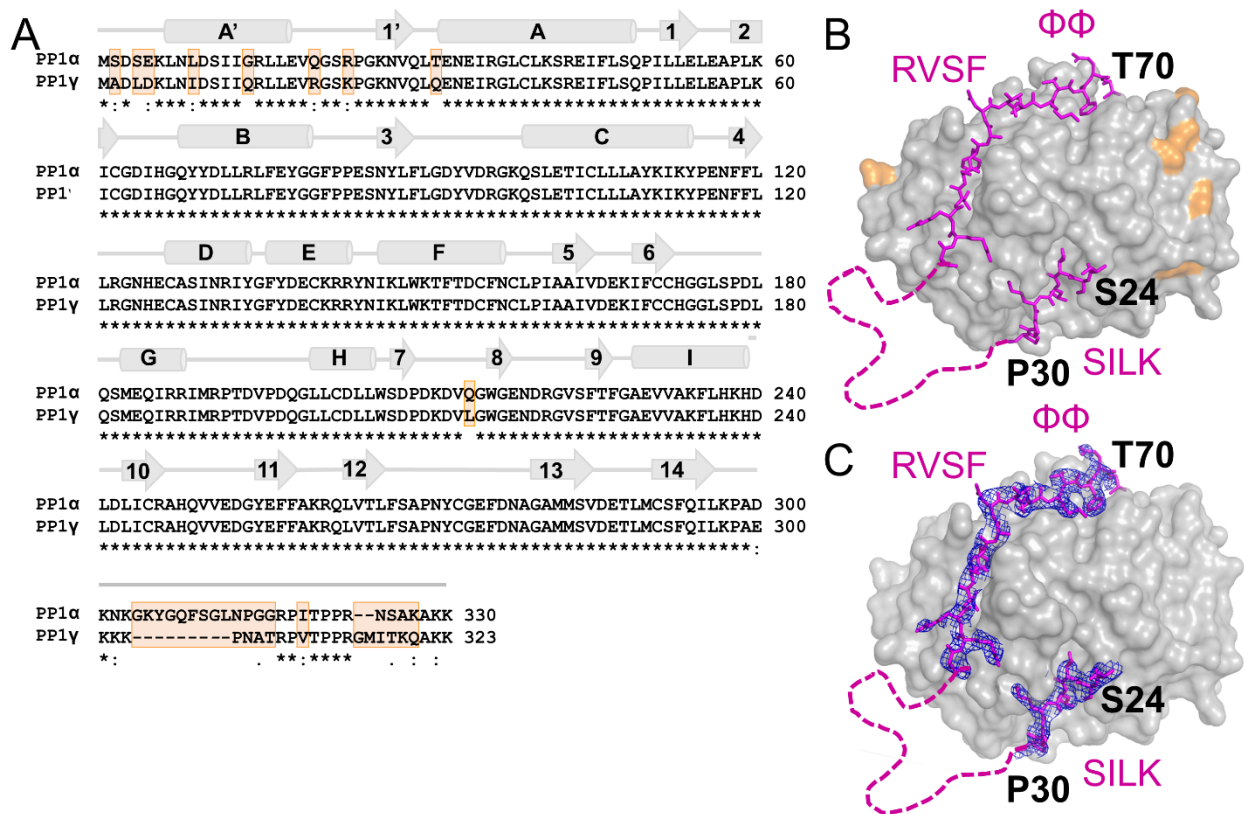

21

22 **Figure S2. KNL1 is not isoform specific.**

23 Related to Figure 1.

24 (A) Sequence alignment of PP1 $\alpha$  and PP1 $\gamma$ , with sequence difference shaded in orange. PP1  
 25 secondary structure elements are shown as cylinders (helices) and arrows (strands) above the  
 26 sequence.

27 (B) The structure of the KNL1:PP1 holoenzyme with KNL1 in pink and PP1 shown as a grey  
 28 surface. Residues that differ between PP1 $\alpha$  and PP1 $\gamma$  are shaded grey. KNL1 does not interact  
 29 with any residues that differ between the two PP1 isoforms.

30 (C) F<sub>o</sub>-F<sub>c</sub> omit map contoured at 1 $\sigma$  of bound KNL1.

31

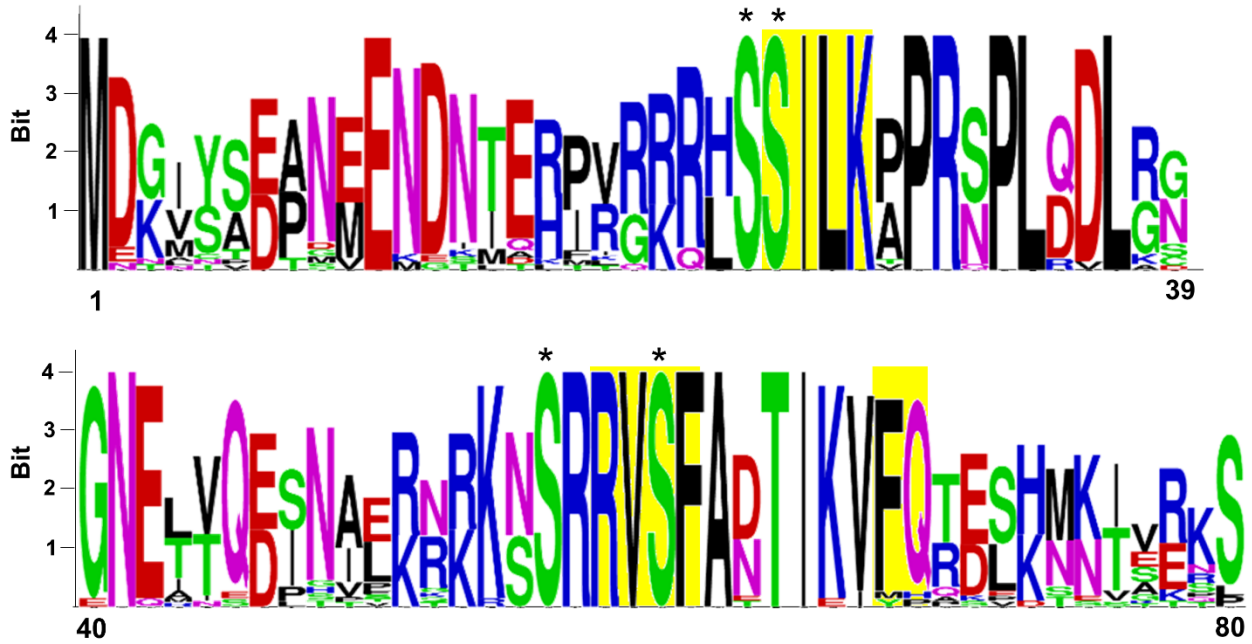

32

33 **Figure S3. Sequence logo of an alignment of KNL1 PP1 interaction domain (residues 1-**  
 34 **80) from 27 organisms from *T. adhaerens* to *H. sapiens*.**

35 Related to Figure 1.

36 PP1 interaction motifs, which are highly conserved, are highlighted in yellow. Serine residues  
 37 phosphorylated by Aurora B Kinase are starred.

38

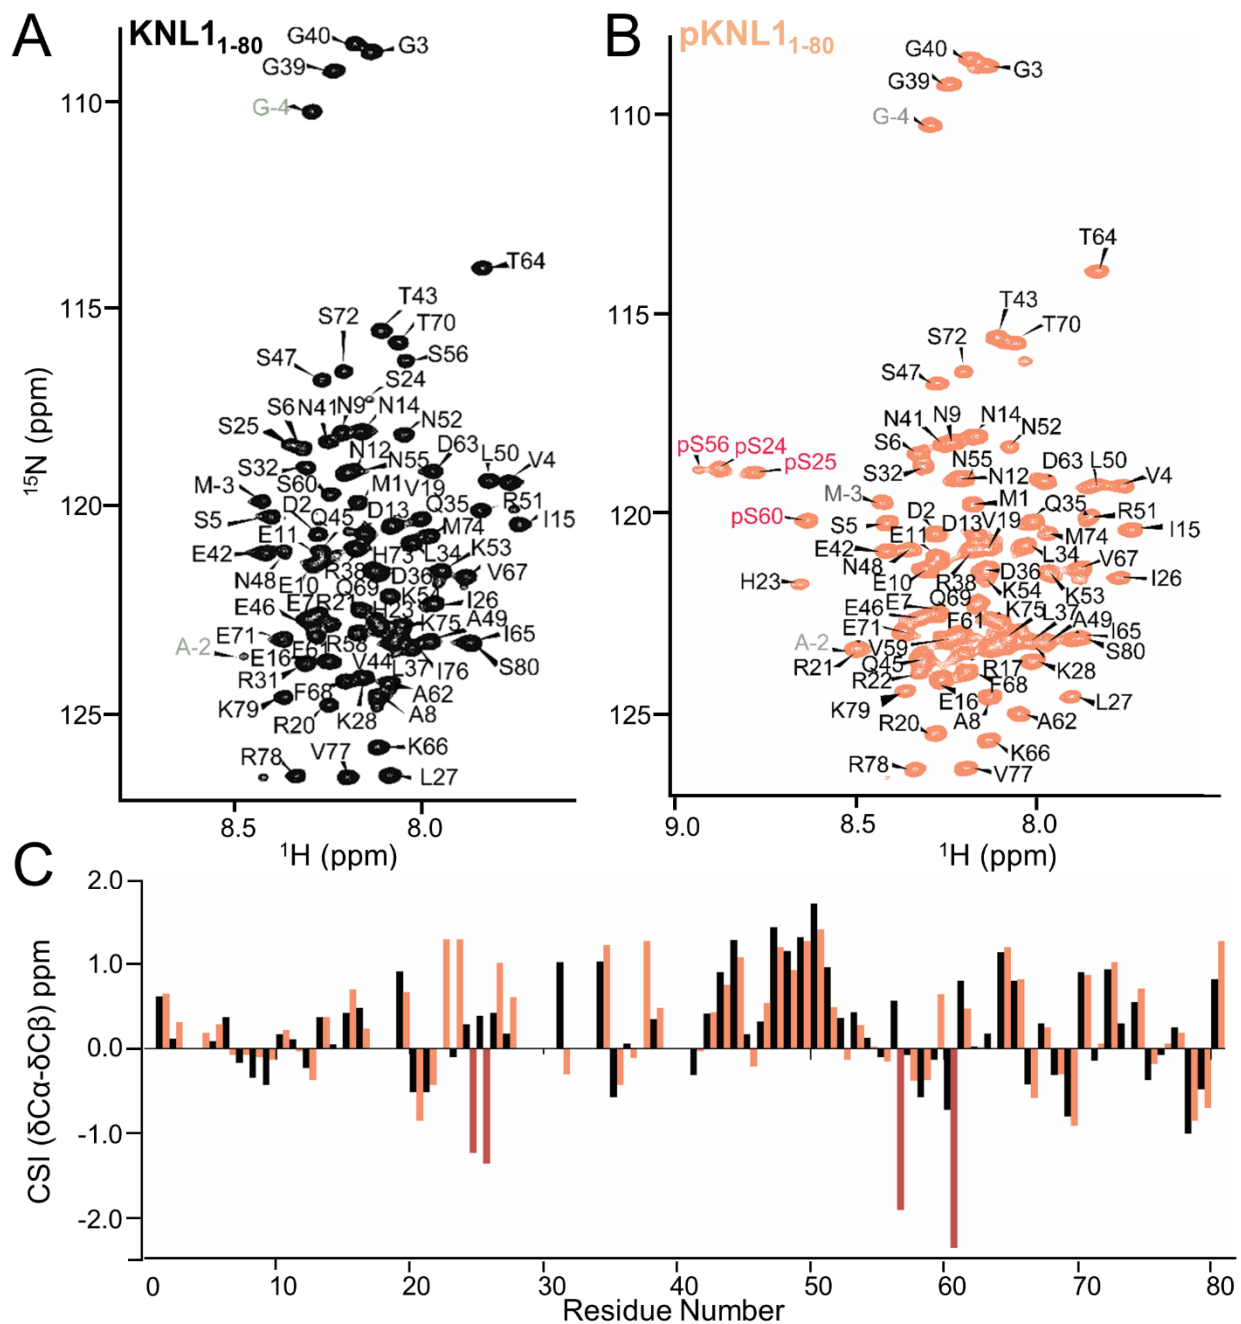

39

40 **Figure S4. KNL1 is phosphorylated by Aurora Kinase at four residues.**

41 Related to Figure 3.

42 2D [ $^1\text{H}$ ,  $^{15}\text{N}$ ] HSQC of (A) KNL1<sub>1-80</sub> (black) and (B) pKNL1<sub>1-80</sub> (phosphorylated by Aurora Kinase;  
 43 orange). Aurora B phosphorylates KNL1 at residues S24, S25, S56 and S60.

44 (C) Chemical shift index (CSI) plotted against residue number for KNL1 (black) and pKNL1  
 45 (orange); the phosphorylated serine residues are indicated (red). Both un-phosphorylated and  
 46 phosphorylated KNL1 lack preformed secondary structure elements.

47

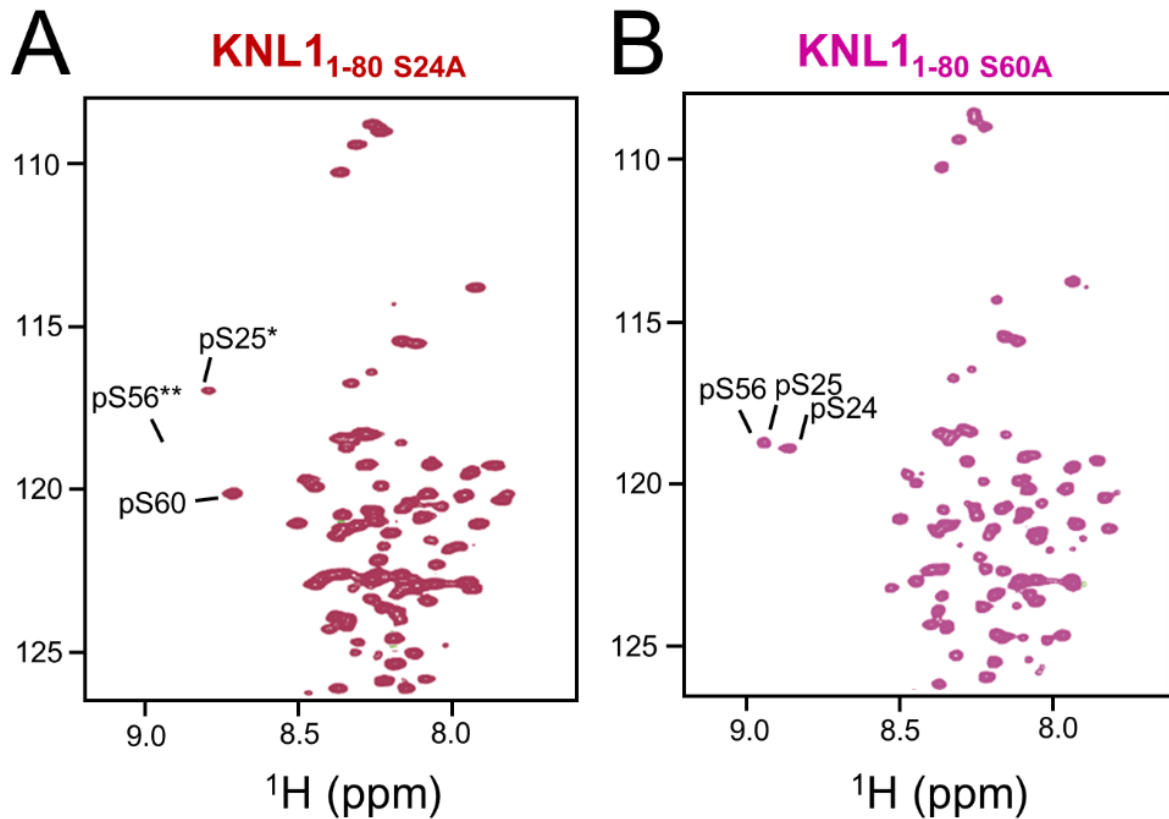

48

49 **Figure S5. KNL1 residues are independently phosphorylated by Aurora B Kinase.**

50 Related to Figure 3.

51 2D [<sup>1</sup>H,<sup>15</sup>N] HSQCs of Aurora B kinase phosphorylated KNL1 variants: **(A)** pKNL1<sub>1-80</sub>S24A and  
 52 **(B)** pKNL1<sub>1-80</sub>S60A. Each single point mutation does not alter the ability of Aurora B kinase to  
 53 phosphorylate the remaining three Ser residues. \*, N-H<sup>N</sup> cross-peak of pS25 in KNL-1<sub>1-80</sub> S24A.  
 54 \*\*pS56 peak is visible at lower contours.

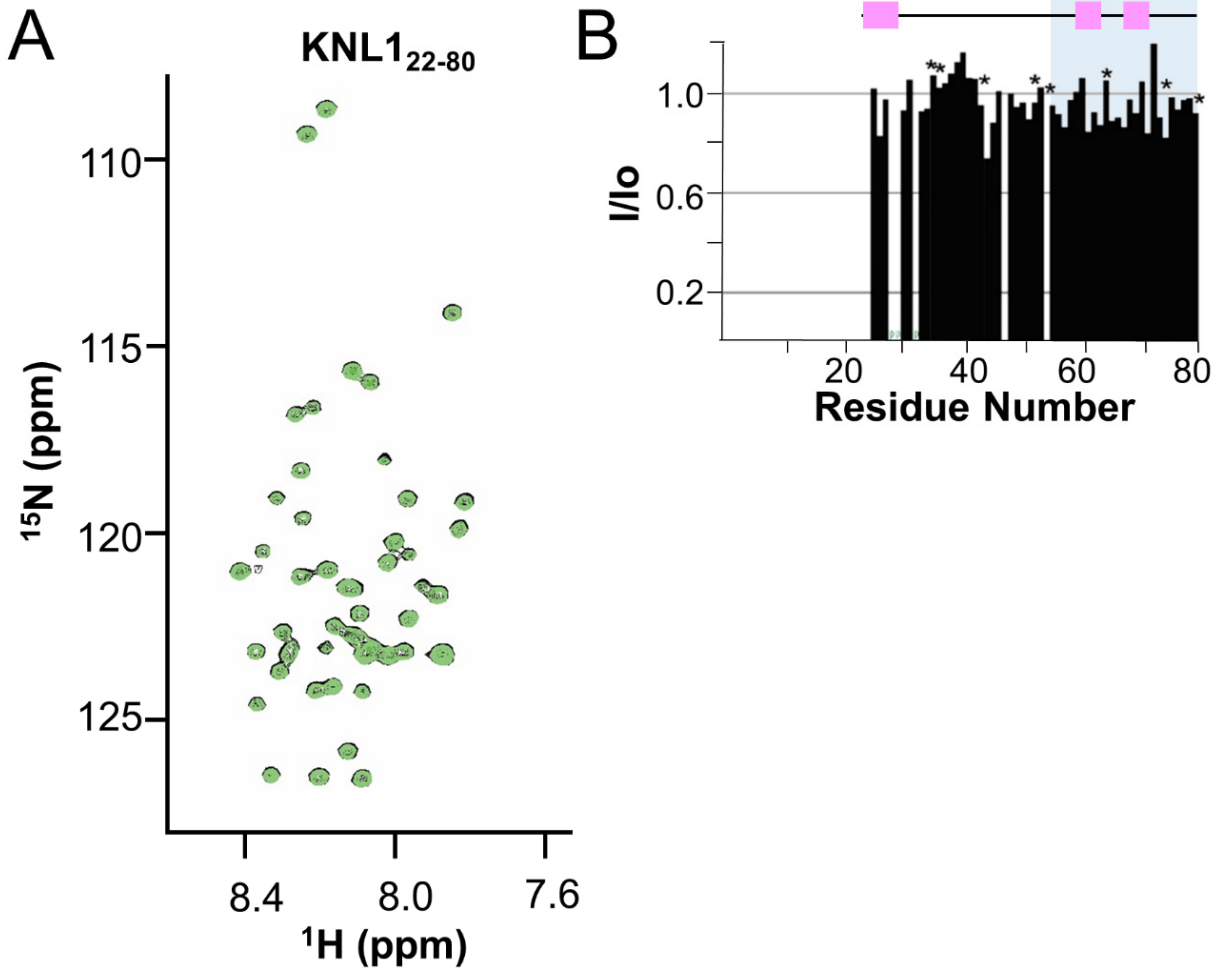

55

56 **Figure S6. MTBS1 is the primary MT binding site in KNL1.**

57 Related to Figure 4

58 **(A)** An overlay of 2D [ $^1\text{H}$ ,  $^{15}\text{N}$ ] HSQC spectrum of free (black) and MTB-bound KNL1<sub>22-80</sub> (green).

59 **(B)** Normalized Intensity ratios of KNL1<sub>MTbound</sub>(I)/ KNL1<sub>free</sub> (I<sub>0</sub>) upon addition of microtubules plotted

60 vs amino acid sequence of KNL1<sub>1-80</sub>; MTB binding site 2 is shaded in light blue. PP1 binding sites

61 (SILK, RVxF and  $\Phi\Phi$ ) are highlighted in pink.

62

63

64

65
